# Supplementary material
Source: Springer Nature journal article supplement (https://www.springermedizin.de/resource/supplementary/12985_2010_834_MOESM8_ESM.pdf/9609292)
Supplement: MOESM8 [file 9609292]

| Groups | Vaccine                 | Number of positive /total | Protection ratio (%) |
|--------|-------------------------|---------------------------|----------------------|
| 1      | GST-sM2                 | 0/15                      | 0                    |
| 2      | GST-C3d-L1-C3d-L2-sM2   | 3/15                      | 20                   |
| 3      | pcDNA-sM2               | 1/15                      | 6.7                  |
| 4      | pcDNA-C3d-L1-C3d-L2-sM2 | 2/15                      | 13.3                 |
| 5      | GST-sM2+IFA             | 4/15                      | 26.7                 |
